# Supplementary material for: Quantification of substoichiometric modification reveals global tsRNA hypomodification, preferences for angiogenin-mediated tRNA cleavage, and idiosyncratic epitranscriptomes of human neuronal cell-lines
Source: PubMed Central journal article supplement (PMC9798144; doi:10.1016/j.csbj.2022.12.020), 2022-12-19
Supplement: mmc1.pdf [file mmc1.pdf]

Supplemental Material to:

# Quantification of substoichiometric tRNA modification sites reveals global hypomodification of tsRNA, indicates preferences for angiogenin-mediated tRNA cleavage, and points to idiosyncratic tRNA epitranscriptomes of human neuronal cell lines

Florian Pichot<sup>1,2</sup>, Marion C. Hogg<sup>3,#</sup>, Virginie Marchand<sup>2</sup>, Valérie Bourguignon<sup>2,4</sup>, Elisabeth Jirström<sup>3</sup>, Cliona Farrell<sup>3</sup>, Hesham A. Gibriel<sup>3</sup>, Jochen H. M. Prehn<sup>3</sup>, Yuri Motorin<sup>2,4,\*</sup>, and Mark Helm<sup>1,\*</sup>

<sup>1</sup> Institute of Pharmaceutical and Biomedical Sciences, Johannes Gutenberg-University Mainz, Staudingerweg 5, 55128 Mainz, Germany.

<sup>2</sup> Université de Lorraine, CNRS, INSERM, IBSLor (UAR2008/US40), Epitranscriptomics and RNA Sequencing Core Facility, F54000 Nancy, France.

<sup>3</sup> Department of Physiology and Medical Physics and SFI FutureNeuro Research Centre, Royal College of Surgeons in Ireland, St. Stephen's Green, Dublin, D02 YN77, Ireland

<sup>4</sup> Université de Lorraine, CNRS, IMoPA (UMR7365), F54000 Nancy, France.

# Present address: School of Science and Technology, Nottingham Trent University, Nottingham, NG1 4FQ, United Kingdom

\* Correspondence to [mhelm@uni-mainz.de](mailto:mhelm@uni-mainz.de) or [yuri.motorin@univ-lorraine.fr](mailto:yuri.motorin@univ-lorraine.fr)

Table S1. List of 149 tRNA modification sites for assessment of stimulus-dependent modification dynamics. A list of all discarded candidates is available in a separated file called "Supp\_Table\_all\_discarded\_candidates.csv"

| <b>tRNA isoacceptor</b> | <b>Absolute position from 5'-end</b> | <b>Relative position according to tRNA structure</b> | <b>Modification</b> | <b>Sites attribution</b>                   |
|-------------------------|--------------------------------------|------------------------------------------------------|---------------------|--------------------------------------------|
| Ala_AGC1                | 17                                   | 17                                                   | D                   | False negative                             |
| Ala_AGC1                | 20                                   | 20                                                   | D                   | False negative                             |
| Ala_AGC1                | 32                                   | 32                                                   | Nm                  | False negative (tRNAdb2009 + TARBP1/FTSJ3) |
| Ala_AGC1                | 39                                   | 39                                                   | Nm                  | True positive (tRNAdb2009)                 |
| Ala_AGC1                | 46                                   | 46                                                   | m7G                 | True positive                              |
| Ala_CGC_TGC_AGC2        | 45                                   | 46                                                   | m7G                 | Putative site                              |
| Ala_CGC_TGC_AGC2        | 48                                   | 49                                                   | m5C                 | Putative site                              |
| Arg_CCG1_TC<br>G        | 32                                   | 32                                                   | Nm                  | False negative (TARBP1/FTSJ3)              |
| Arg_ACG                 | 16                                   | 16                                                   | D                   | Putative site                              |
| Arg_ACG                 | 32                                   | 32                                                   | Nm                  | False negative (TARBP1/FTSJ3)              |
| Arg_ACG                 | 47                                   | 47                                                   | D                   | Putative site                              |
| Arg_CCT_CCG<br>2        | 16                                   | 16                                                   | D                   | Putative site                              |
| Arg_CCT_CCG<br>2        | 20                                   | 20                                                   | D                   | Putative site                              |

|                  |    |     |     |                                  |
|------------------|----|-----|-----|----------------------------------|
| Arg_CCT_CCG<br>2 | 32 | 32  | m3C | True positive                    |
| Arg_TCT          | 16 | 16  | D   | Putative site                    |
| Arg_TCT          | 20 | 20a | D   | Putative site                    |
| Arg_TCT          | 46 | 46  | m7G | Putative site                    |
| Asn_GTT          | 16 | 16  | D   | False negative                   |
| Asn_GTT          | 20 | 20  | D   | False negative                   |
| Asn_GTT          | 47 | 46  | m7G | True positive                    |
| Asn_GTT          | 48 | 47  | D   | False negative                   |
| Asn_GTT          | 55 | 54  | Nm  | Putative site                    |
| Asp_GTC          | 19 | 20  | D   | Putative site                    |
| Asp_GTC          | 38 | 38  | m5C | Putative site                    |
| Asp_GTC          | 47 | 48  | m5C | Putative site                    |
| Asp_GTC          | 48 | 49  | m5C | Putative site                    |
| Cys_GCA          | 19 | 20  | D   | Putative site                    |
| Cys_GCA          | 31 | 32  | Nm  | False negative<br>(TARBP1/FTSJ3) |
| Cys_GCA          | 45 | 46  | m7G | Putative site                    |
| Cys_GCA          | 48 | 49  | m5C | Putative site                    |
| Cys_GCA          | 71 | 72  | m5C | Putative site                    |
| Gln_CTG2         | 48 | 49  | m5C | Putative site                    |

|                  |    |     |     |                                                  |
|------------------|----|-----|-----|--------------------------------------------------|
| Gln_CTG1_TT<br>G | 16 | 17  | D   | Putative site                                    |
| Gln_CTG1_TT<br>G | 17 | 18  | Nm  | False negative<br>(tRNAdb2009 +<br>TARBP1/FTSJ3) |
| Gln_CTG1_TT<br>G | 19 | 20  | D   | True positive                                    |
| Gln_CTG1_TT<br>G | 20 | 20a | D   | False negative                                   |
| Gln_CTG1_TT<br>G | 32 | 32  | Nm  | False negative<br>(tRNAdb2009 +<br>TARBP1/FTSJ3) |
| Gln_CTG1_TT<br>G | 48 | 49  | m5C | True positive                                    |
| Gln_CTG1_TT<br>G | 49 | 50  | m5C | True positive                                    |
| Glu_CTC_TTC<br>1 | 19 | 20  | D   | True positive                                    |
| Glu_CTC_TTC<br>1 | 20 | 20a | D   | True positive                                    |
| Glu_CTC_TTC<br>1 | 48 | 49  | m5C | True positive                                    |
| Glu_CTC_TTC<br>1 | 49 | 50  | m5C | True positive                                    |
| Glu_CTC_TTC<br>1 | 53 | 54  | Nm  | True positive<br>(tRNAdb2009)                    |
| Glu_TTC2         | 19 | 20  | D   | Putative site                                    |
| Glu_TTC2         | 20 | 20a | D   | Putative site                                    |
| Glu_TTC2         | 48 | 49  | m5C | Putative site                                    |
| Glu_TTC2         | 49 | 50  | m5C | Putative site                                    |

|                  |    |     |     |                                 |
|------------------|----|-----|-----|---------------------------------|
| Glu_TTC2         | 53 | 54  | Nm  | Putative site                   |
| Gly_TCC          | 19 | 20  | D   | True positive                   |
| Gly_TCC          | 48 | 49  | m5C | Putative site                   |
| Gly_CCC2         | 19 | 20  | D   | True positive                   |
| Gly_CCC2         | 31 | 32  | Nm  | True positive<br>(TARBP1/FTSJ3) |
| Gly_CCC2         | 38 | 39  | Nm  | True positive<br>(tRNAdb2009)   |
| Gly_CCC2         | 47 | 49  | m5C | True positive                   |
| Gly_CCC2         | 48 | 50  | m5C | True positive                   |
| Gly_CCC1_GC<br>C | 37 | 38  | m5C | True positive                   |
| Gly_CCC1_GC<br>C | 46 | 48  | m5C | True positive                   |
| Gly_CCC1_GC<br>C | 47 | 49  | m5C | True positive                   |
| Gly_CCC1_GC<br>C | 48 | 50  | m5C | True positive                   |
| His_GTG          | 16 | 17  | D   | False negative                  |
| His_GTG          | 19 | 20  | D   | True positive                   |
| His_GTG          | 20 | 20a | D   | True positive                   |
| His_GTG          | 48 | 49  | m5C | True positive                   |
| His_GTG          | 49 | 50  | m5C | False negative                  |
| His_GTG          | 71 | 72  | m5C | Putative site                   |

|             |    |    |     |                               |
|-------------|----|----|-----|-------------------------------|
| Ile_AAT_GAT | 47 | 46 | m7G | Putative site                 |
| Ile_AAT_GAT | 49 | 48 | m5C | Putative site                 |
| Ile_TAT     | 47 | 46 | m7G | Putative site                 |
| Leu_TAA     | 20 | 20 | D   | False negative                |
| Leu_TAA     | 34 | 34 | Nm  | False negative (TARBP1/FTSJ3) |
| Leu_TAA     | 58 | 48 | m5C | True positive                 |
| Leu_CAG_CAA | 33 | 32 | Nm  | True positive (TARBP1/FTSJ3)  |
| Leu_CAG_CAA | 45 | 44 | Nm  | True positive (tRNAdb2009)    |
| Leu_CAG_CAA | 51 | e2 | m3C | True positive                 |
| Leu_CAG_CAA | 58 | 48 | m5C | Putative site                 |
| Lys_CTT     | 16 | 16 | D   | Putative site                 |
| Lys_CTT     | 46 | 46 | m7G | Putative site                 |
| Lys_CTT     | 48 | 48 | m5C | Putative site                 |
| Lys_CTT     | 54 | 54 | Nm  | Putative site                 |
| Lys_TTT     | 16 | 16 | D   | Putative site                 |
| Lys_TTT     | 46 | 46 | m7G | Putative site                 |
| Lys_TTT     | 49 | 49 | m5C | Putative site                 |
| Lys_TTT     | 54 | 54 | Nm  | Putative site                 |
| Met_CAT     | 20 | 20 | m3C | True positive                 |

|                     |    |    |     |                                                  |
|---------------------|----|----|-----|--------------------------------------------------|
| Met_CAT             | 34 | 34 | Nm  | False negative<br>(tRNAdb2009 +<br>TARBP1/FTSJ3) |
| Met_CAT             | 46 | 46 | m7G | True positive                                    |
| Met_CAT             | 47 | 47 | D   | False negative                                   |
| Met_CAT             | 48 | 48 | m5C | False negative                                   |
| Phe_GAA             | 16 | 16 | D   | False negative                                   |
| Phe_GAA             | 17 | 17 | D   | False negative                                   |
| Phe_GAA             | 32 | 32 | Nm  | False negative<br>(tRNAdb2009 +<br>TARBP1/FTSJ3) |
| Phe_GAA             | 34 | 34 | Nm  | False negative<br>(tRNAdb2009 +<br>TARBP1/FTSJ3) |
| Phe_GAA             | 46 | 46 | m7G | True positive                                    |
| Phe_GAA             | 47 | 47 | D   | False negative                                   |
| Phe_GAA             | 49 | 49 | m5C | True positive                                    |
| Pro_AGG_CG<br>G_TGG | 19 | 20 | D   | Putative site                                    |
| Pro_AGG_CG<br>G_TGG | 31 | 32 | Nm  | False negative<br>(TARBP1/FTSJ3)                 |
| Pro_AGG_CG<br>G_TGG | 45 | 46 | m7G | Putative site                                    |
| Pro_AGG_CG<br>G_TGG | 48 | 49 | m5C | Putative site                                    |
| Pro_AGG_CG<br>G_TGG | 49 | 50 | m5C | Putative site                                    |

|                   |    |     |     |                                                  |
|-------------------|----|-----|-----|--------------------------------------------------|
| Ser_AGA_TGA       | 16 | 17  | D   | False negative                                   |
| Ser_AGA_TGA       | 17 | 18  | Nm  | False negative<br>(tRNAdb2009 +<br>TARBP1/FTSJ3) |
| Ser_AGA_TGA       | 19 | 20  | D   | False negative                                   |
| Ser_AGA_TGA       | 20 | 20a | D   | False negative                                   |
| Ser_AGA_TGA       | 32 | 32  | m3C | True positive                                    |
| Ser_AGA_TGA       | 44 | 44  | Nm  | True positive<br>(tRNAdb2009)                    |
| Ser_AGA_TGA       | 50 | e2  | m3C | False negative                                   |
| Ser_AGA_TGA       | 57 | 49  | m5C | True positive                                    |
| Ser_GCT           | 17 | 18  | Nm  | False negative<br>(TARBP1/FTSJ3)                 |
| Ser_GCT           | 32 | 32  | m3C | True positive                                    |
| Ser_GCT           | 39 | 39  | Nm  | Putative site                                    |
| Ser_GCT           | 44 | 44  | Nm  | Putative site                                    |
| Ser_GCT           | 57 | 49  | m5C | Putative site                                    |
| Thr_CGT1          | 31 | 32  | m3C | True positive                                    |
| Thr_CGT1          | 47 | 48  | m5C | Putative site                                    |
| Thr_CGT1          | 71 | 72  | m5C | Putative site                                    |
| Thr_TGT1_CG<br>T2 | 19 | 20  | D   | Putative site                                    |
| Thr_TGT1_CG<br>T2 | 32 | 32  | m3C | Putative site                                    |



|                       |    |    |     |                                  |
|-----------------------|----|----|-----|----------------------------------|
| Thr_TGT1_CG<br>T2     | 46 | 46 | m7G | Putative site                    |
| Thr_TGT1_CG<br>T2     | 48 | 48 | m5C | Putative site                    |
| Thr_TGT1_CG<br>T2     | 72 | 72 | m5C | Putative site                    |
| Thr_AGT_CGT<br>3_TGT2 | 33 | 32 | m3C | True positive                    |
| Thr_AGT_CGT<br>3_TGT2 | 48 | 47 | D   | Putative site                    |
| Thr_AGT_CGT<br>3_TGT2 | 49 | 48 | m5C | Putative site                    |
| Thr_AGT_CGT<br>3_TGT2 | 50 | 49 | m5C | Putative site                    |
| Thr_AGT_CGT<br>3_TGT2 | 73 | 72 | m5C | Putative site                    |
| Trp_CCA               | 31 | 32 | Nm  | False negative<br>(TARBP1/FTSJ3) |
| Trp_CCA               | 33 | 34 | Nm  | False negative<br>(TARBP1/FTSJ3) |
| Trp_CCA               | 38 | 39 | Nm  | Putative site                    |
| Trp_CCA               | 45 | 46 | m7G | Putative site                    |
| Tyr_GTA1              | 16 | 16 | D   | False negative                   |
| Tyr_GTA1              | 17 | 17 | D   | False negative                   |
| Tyr_GTA1              | 46 | 46 | m7G | True positive                    |
| Tyr_GTA1              | 47 | 47 | D   | False negative                   |
| Tyr_GTA1              | 48 | 48 | m5C | True positive                    |

|                 |    |     |     |                |
|-----------------|----|-----|-----|----------------|
| Va_AAC_CAC_TAC1 | 16 | 17  | D   | False negative |
| Va_AAC_CAC_TAC1 | 19 | 20  | D   | False negative |
| Va_AAC_CAC_TAC1 | 20 | 20a | D   | False negative |
| Va_AAC_CAC_TAC1 | 38 | 38  | m5C | Putative site  |
| Va_AAC_CAC_TAC1 | 46 | 46  | m7G | True positive  |
| Va_AAC_CAC_TAC1 | 47 | 47  | D   | False negative |
| Va_AAC_CAC_TAC1 | 48 | 48  | m5C | Putative site  |
| Va_AAC_CAC_TAC1 | 49 | 49  | m5C | Putative site  |
| Va_TAC2         | 19 | 20  | D   | Putative site  |
| Va_TAC2         | 20 | 20a | D   | Putative site  |
| Va_TAC2         | 46 | 46  | m7G | Putative site  |
| Va_TAC2         | 48 | 48  | m5C | True positive  |
| Va_TAC2         | 49 | 49  | m5C | True positive  |

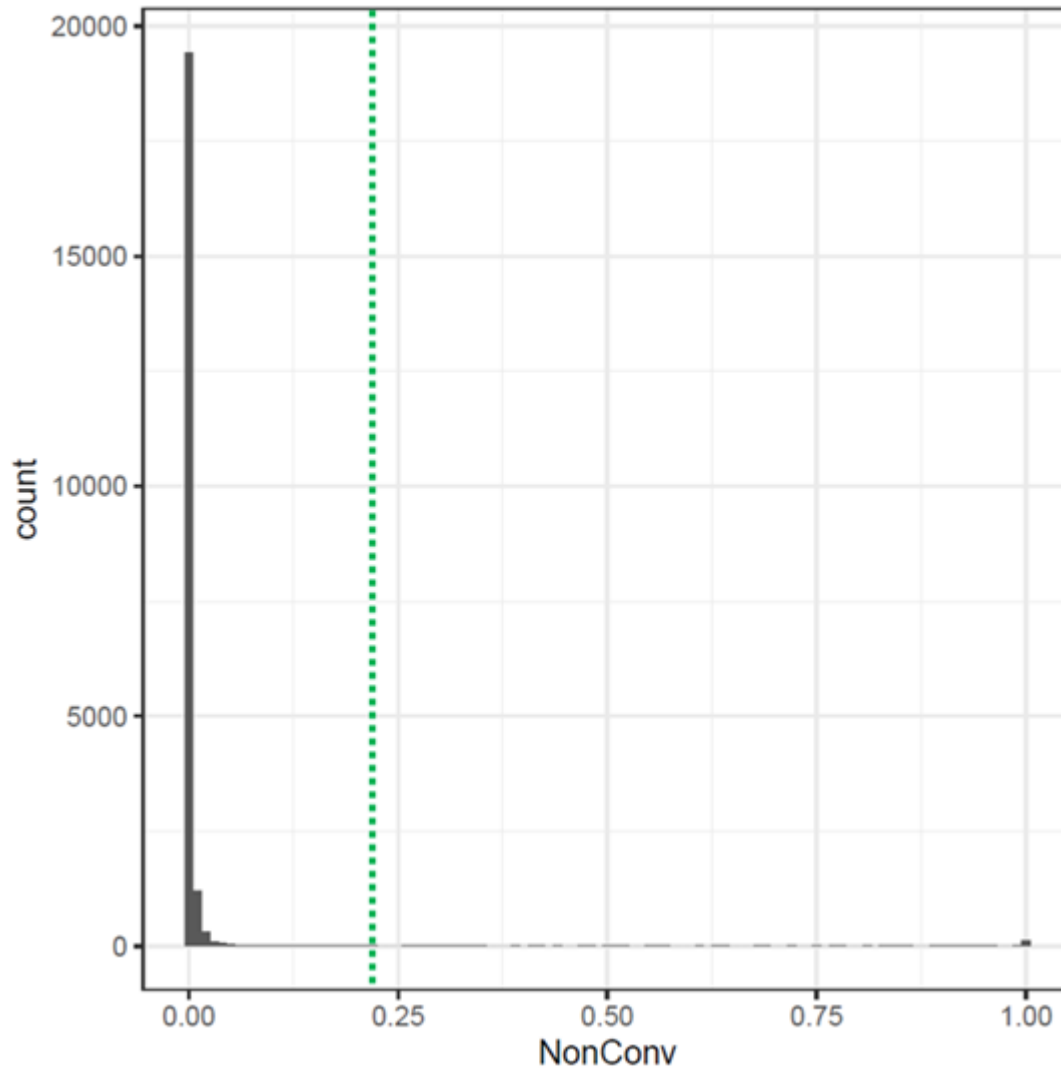

**Figure S1 : Noise estimation of Bisulfite Non-conversion rate from Bisulfite sequencing.** Each bar represents the counts of non-m5C sites (all rRNA C sites except 2 known positions in rRNA 28S) according to their bisulfite non conversion rate (NonConv). The distribution of these non-m5C sites, considered as noise, helped setting up a detection threshold at 0.228, corresponding to the average plus 3 times the standard deviation of the noise distribution, highlighted here by a green vertical bar.

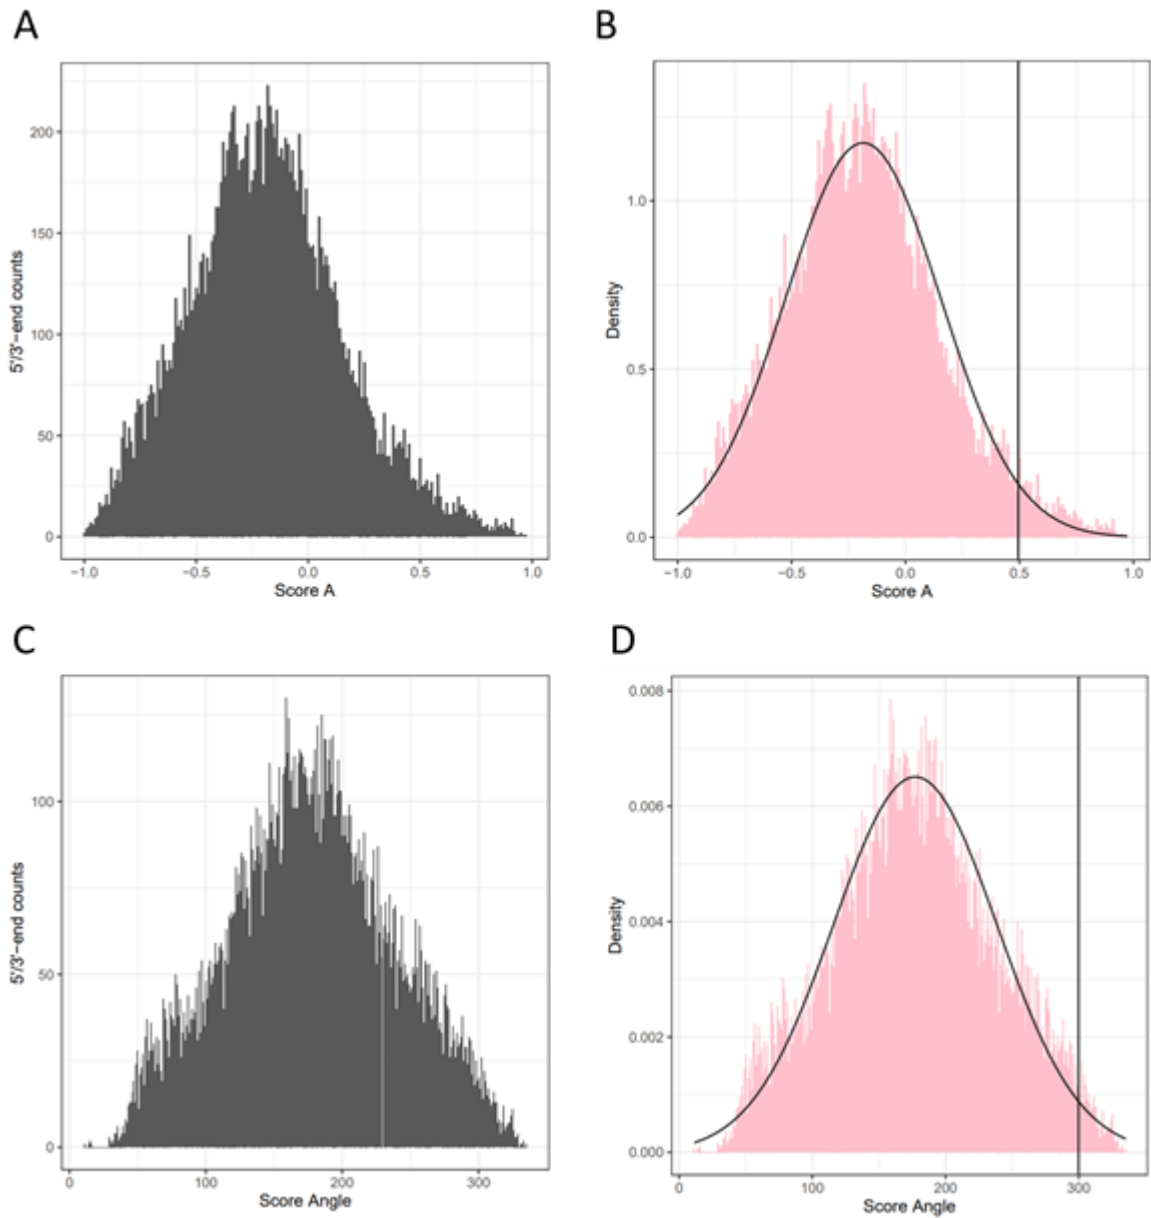

**Figure S2 : Noise estimation of the different RiboMethScores from RiboMethSeq.** Panels (A, C) displays non 2'-O-methylated sites (all tRNA sites not located at position 18, 32, 34, 39, 44 and 54) count distribution according to score A and score Angle, respectively. Panels (B, D) display fitting of noise distribution to a Gaussian distribution for score A and score Angle, respectively. The vertical bar indicates the threshold used for both scores which is at the noise average plus 2 times the noise standard deviation, which is 0.495 for score A and 300 for score Angle.

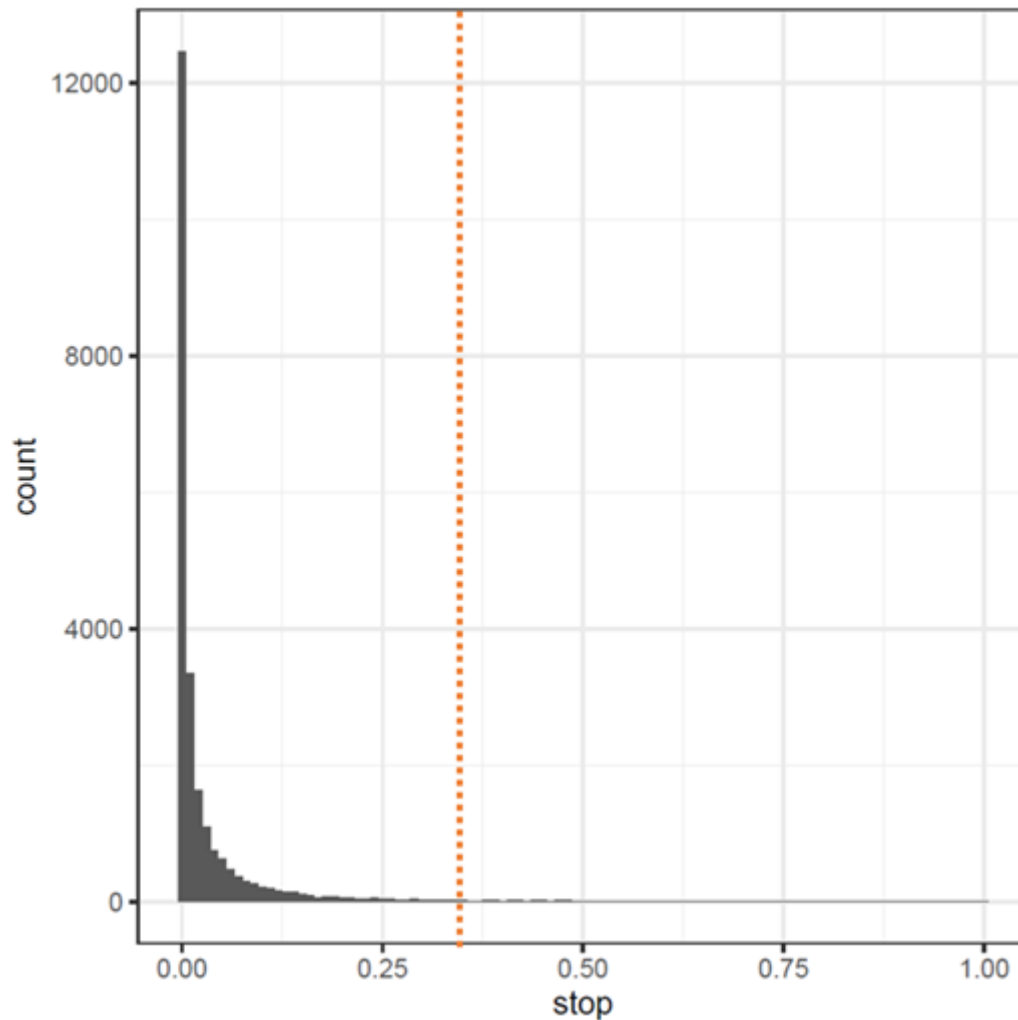

**Figure S3 : Noise estimation of stop ratio from AlkAnilineSeq.**

Each bar represents the counts of sites unseen by AlkAnilineSeq (no m7G, m3C ou D known enzymatic positions) according to their stop ratio (stop). The distribution of these undetectable sites has been considered as noise for detection threshold characterisation. Threshold determination through noise average + 3\* noise standard deviation application occurs within a range from 0.263 (For A sites) to 0.418 (For G sites), with a default threshold of 0.353 while taking in account all nucleotides (represented here by an orange vertical bar).

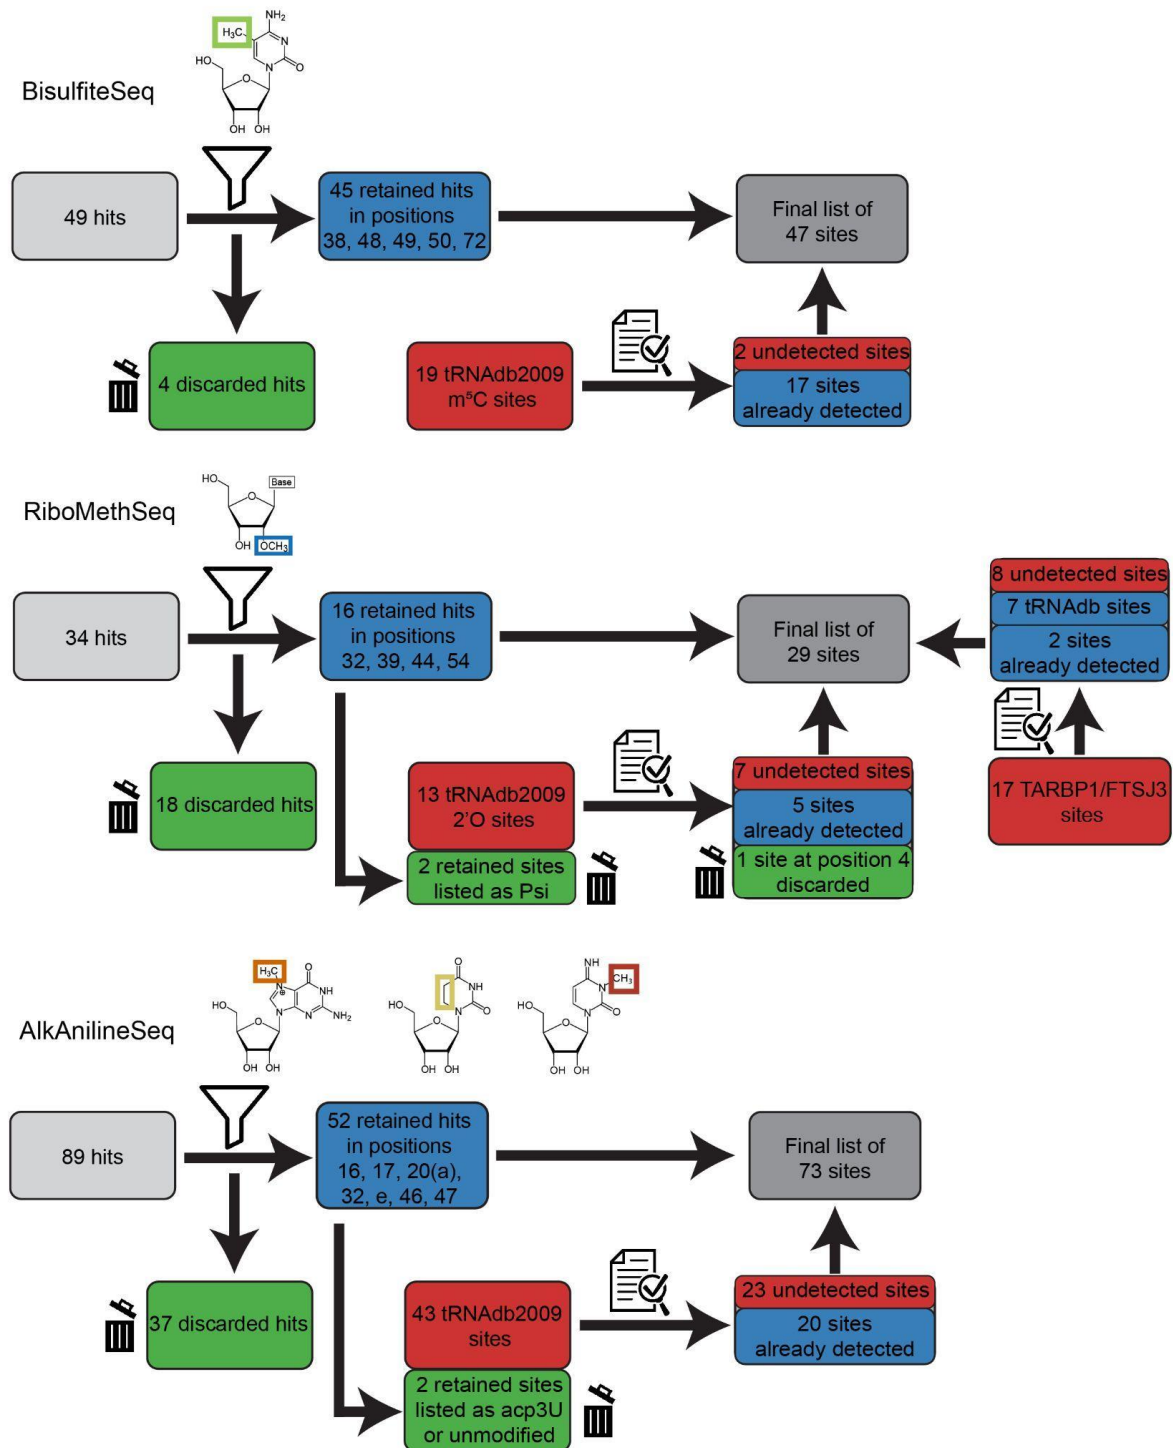

**Figure S4 : Flow-chart on sites selection.** Counting of retained and discarded hits along the analyses of the three different sequencing methods. On top, the sites selection for Bisulfite sequencing started with 49 total hits where 4 of them didn't belong to known m<sup>5</sup>C sites. After comparison with tRNAb2009, 2 sites have been missed and have been added back to the list. For RiboMethSeq in the middle, out of the 34 initial hits, 18 didn't belong to known 2'-O-methylated sites. After comparison with tRNAb2009 and two papers from the literature (Marchand et al., 2017 and Angelova and al. 2020) with validated sites for Gm18 and Nm32/34, 16 undetected

sites have been added back and 2 hits which are referenced as pseudouridine residues have been discarded. Finally, for AlkAnilineSeq at the bottom, 37 hits have been discarded from the 89 initial ones. Then, by comparing our hits with tRNAdb2009, 23 known sites (mainly dihydrouridine ones) has been missed and added back, while 1 hit which was originally retained has been identified as acp3U and another 1 was known as unmodified. The list of all discarded candidates is available in a separate file called "Supp\_Table\_all\_discarded\_candidates.csv"

## Tables S2-S6 Wilcoxon's test for assessment of significant differences between datasets

All p-values below have been calculated with the function "wilcox.test" from the *stats* R package with default parameters, which means the alternative hypothesis tested here is "two.sided".

Table S2A : Significant differences estimation for m5C without cell line distinction.

|           | -Ang_tRNA    | -Ang_tRF   | +Ang_tRNA | +Ang_tRF |
|-----------|--------------|------------|-----------|----------|
| -Ang_tRNA | 1            |            |           |          |
| -Ang_tRF  | <0.0001 **** | 1          |           |          |
| +Ang_tRNA | 0.3966       | 0.0002 *** | 1         |          |
| +Ang_tRF  | 0.0003 ***   | 0.2058     | 0.004 **  | 1        |

Table S2B : Significant differences estimation for m5C with cell line distinction.

|              | MZ_-Ang_tRNA | SH_-Ang_tRNA | MZ_-Ang_tRF | SH_-Ang_tRF | MZ_+Ang_tRNA | SH_+Ang_tRNA | MZ_+Ang_tRF | SH_+Ang_tRF |
|--------------|--------------|--------------|-------------|-------------|--------------|--------------|-------------|-------------|
| MZ_-Ang_tRNA | 1            |              |             |             |              |              |             |             |
| SH_-Ang_tRNA | 0.9646       | 1            |             |             |              |              |             |             |
| MZ_-Ang_tRF  | 0.0012 **    | 0.0011 **    | 1           |             |              |              |             |             |
| SH_-Ang_tRF  | 0.004 **     | 0.0065 **    | 0.7278      | 1           |              |              |             |             |
| MZ_+Ang_tRNA | 0.2081       | 0.2339       | 0.0154 *    | 0.0406 *    | 1            |              |             |             |
| SH_+Ang_tRNA | 0.7534       | 0.7444       | 0.0008 ***  | 0.0023 **   | 0.1318       | 1            |             |             |
| MZ_+Ang_tRF  | 0.0252 *     | 0.0258 *     | 0.1431      | 0.2978      | 0.2552       | 0.0175 *     | 1           |             |
| SH_+Ang_tRF  | 0.0035 **    | 0.0041 **    | 0.4420      | 0.8192      | 0.0406 *     | 0.0019 **    | 0.4091      | 1           |

Table S3A : Significant differences estimation for Nm without cell line distinction.

|           | -Ang_tRNA | -Ang_tRF  | +Ang_tRNA | +Ang_tRF |
|-----------|-----------|-----------|-----------|----------|
| -Ang_tRNA | 1         |           |           |          |
| -Ang_tRF  | 0.0015 ** | 1         |           |          |
| +Ang_tRNA | 0.6181    | 0.0039 ** | 1         |          |
| +Ang_tRF  | 0.003 **  | 0.6887    | 0.0129 *  | 1        |

Table S3B : Significant differences estimation for Nm with cell line distinction.

|              | MZ_-Ang_tRNA | SH_-Ang_tRNA | MZ_-Ang_tRF | SH_-Ang_tRF | MZ_+Ang_tRNA | SH_+Ang_tRNA | MZ_+Ang_tRF | SH_+Ang_tRF |
|--------------|--------------|--------------|-------------|-------------|--------------|--------------|-------------|-------------|
| MZ_-Ang_tRNA | 1            |              |             |             |              |              |             |             |
| SH_-Ang_tRNA | 0.2043       | 1            |             |             |              |              |             |             |
| MZ_-Ang_tRF  | 0.1823       | 0.0228 *     | 1           |             |              |              |             |             |
| SH_-Ang_tRF  | 0.0294 *     | 0.0019 **    | 0.5924      | 1           |              |              |             |             |
| MZ_+Ang_tRNA | 0.9814       | 0.2838       | 0.1195      | 0.0177 *    | 1            |              |             |             |
| SH_+Ang_tRNA | 0.7637       | 0.5376       | 0.0954      | 0.0117 *    | 0.7274       | 1            |             |             |
| MZ_+Ang_tRF  | 0.3631       | 0.0328 *     | 0.5028      | 0.0955      | 0.3049       | 0.1937       | 1           |             |
| SH_+Ang_tRF  | 0.0224 *     | 0.0023 **    | 0.3157      | 0.8034      | 0.0245 *     | 0.0135 *     | 0.0864      | 1           |

Table S4A : Significant differences estimation for m7G without cell line distinction.

|           | -Ang_tRNA | -Ang_tRF | +Ang_tRNA | +Ang_tRF |
|-----------|-----------|----------|-----------|----------|
| -Ang_tRNA | 1         |          |           |          |
| -Ang_tRF  | 0.6476    | 1        |           |          |
| +Ang_tRNA | 0.2239    | 0.0805   | 1         |          |
| +Ang_tRF  | 0.8886    | 0.53     | 0.2286    | 1        |

Table S4B : Significant differences estimation for m7G with cell line distinction.

|              | MZ_-Ang_tRNA | SH_-Ang_tRNA | MZ_-Ang_tRF | SH_-Ang_tRF | MZ_+Ang_tRNA | SH_+Ang_tRNA | MZ_+Ang_tRF | SH_+Ang_tRF |
|--------------|--------------|--------------|-------------|-------------|--------------|--------------|-------------|-------------|
| MZ_-Ang_tRNA | 1            |              |             |             |              |              |             |             |
| SH_-Ang_tRNA | 0.0106 *     | 1            |             |             |              |              |             |             |
| MZ_-Ang_tRF  | 0.0987       | 0.3057       | 1           |             |              |              |             |             |
| SH_-Ang_tRF  | 0.1139       | 0.3753       | 0.9729      | 1           |              |              |             |             |
| MZ_+Ang_tRNA | 0.8119       | 0.0131 *     | 0.0789      | 0.1309      | 1            |              |             |             |
| SH_+Ang_tRNA | 0.3571       | 0.0987       | 0.4134      | 0.4536      | 0.2181       | 1            |             |             |
| MZ_+Ang_tRF  | 0.4134       | 0.0987       | 0.4958      | 0.4332      | 0.3223       | 1            | 1           |             |
| SH_+Ang_tRF  | 0.1401       | 0.2897       | 0.9729      | 0.8384      | 0.0851       | 0.5177       | 0.5177      | 1           |

Table S5A : Significant differences estimation for m3C without cell line distinction.



|           | -Ang_tRNA | -Ang_tRF | +Ang_tRNA | +Ang_tRF |
|-----------|-----------|----------|-----------|----------|
| -Ang_tRNA | 1         |          |           |          |
| -Ang_tRF  | 0.0276 *  | 1        |           |          |
| +Ang_tRNA | 0.7901    | 0.0121 * | 1         |          |
| +Ang_tRF  | 0.1011    | 0.5641   | 0.11      | 1        |

Table S5B : Significant differences estimation for m3C with cell line distinction.

|              | MZ_-Ang_tRNA | SH_-Ang_tRNA | MZ_-Ang_tRF | SH_-Ang_tRF | MZ_+Ang_tRNA | SH_+Ang_tRNA | MZ_+Ang_tRF | SH_+Ang_tRF |
|--------------|--------------|--------------|-------------|-------------|--------------|--------------|-------------|-------------|
| MZ_-Ang_tRNA | 1            |              |             |             |              |              |             |             |
| SH_-Ang_tRNA | 0.0293 *     | 1            |             |             |              |              |             |             |
| MZ_-Ang_tRF  | 0.6052       | 0.007 **     | 1           |             |              |              |             |             |
| SH_-Ang_tRF  | 0.8518       | 0.0207 *     | 0.8785      | 1           |              |              |             |             |
| MZ_+Ang_tRNA | 0.2824       | 0.5054       | 0.065       | 0.1304      | 1            |              |             |             |
| SH_+Ang_tRNA | 0.2284       | 0.6454       | 0.0499 *    | 0.1605      | 0.8785       | 1            |             |             |
| MZ_+Ang_tRF  | 0.8518       | 0.065        | 0.5737      | 0.7984      | 0.3823       | 0.2786       | 1           |             |
| SH_+Ang_tRF  | 0.9497       | 0.0281 *     | 0.6454      | 0.8785      | 0.2786       | 0.2345       | 0.9591      | 1           |

Table S6A : Significant differences estimation for D without cell line distinction.

|           | -Ang_tRNA | -Ang_tRF | +Ang_tRNA | +Ang_tRF |
|-----------|-----------|----------|-----------|----------|
| -Ang_tRNA | 1         |          |           |          |
| -Ang_tRF  | 0.4496    | 1        |           |          |
| +Ang_tRNA | 0.918     | 0.5311   | 1         |          |
| +Ang_tRF  | 0.5257    | 0.928    | 0.6514    | 1        |

Table S6B : Significant differences estimation for D with cell line distinction.

|              | MZ_-Ang_tRNA | SH_-Ang_tRNA | MZ_-Ang_tRF | SH_-Ang_tRF | MZ_+Ang_tRNA | SH_+Ang_tRNA | MZ_+Ang_tRF | SH_+Ang_tRF |
|--------------|--------------|--------------|-------------|-------------|--------------|--------------|-------------|-------------|
| MZ_-Ang_tRNA | 1            |              |             |             |              |              |             |             |
| SH_-Ang_tRNA | 0.9109       | 1            |             |             |              |              |             |             |
| MZ_-Ang_tRF  | 0.5193       | 0.5059       | 1           |             |              |              |             |             |
| SH_-Ang_tRF  | 0.6099       | 0.7624       | 0.7822      | 1           |              |              |             |             |
| MZ_+Ang_tRNA | 0.9002       | 0.9106       | 0.6595      | 0.8089      | 1            |              |             |             |
| SH_+Ang_tRNA | 0.918        | 0.9586       | 0.4787      | 0.7167      | 0.829        | 1            |             |             |
| MZ_+Ang_tRF  | 0.5847       | 0.5979       | 0.8628      | 0.8357      | 0.7688       | 0.6345       | 1           |             |
| SH_+Ang_tRF  | 0.7037       | 0.746        | 0.7889      | 0.9862      | 0.8833       | 0.7297       | 0.9037      | 1           |

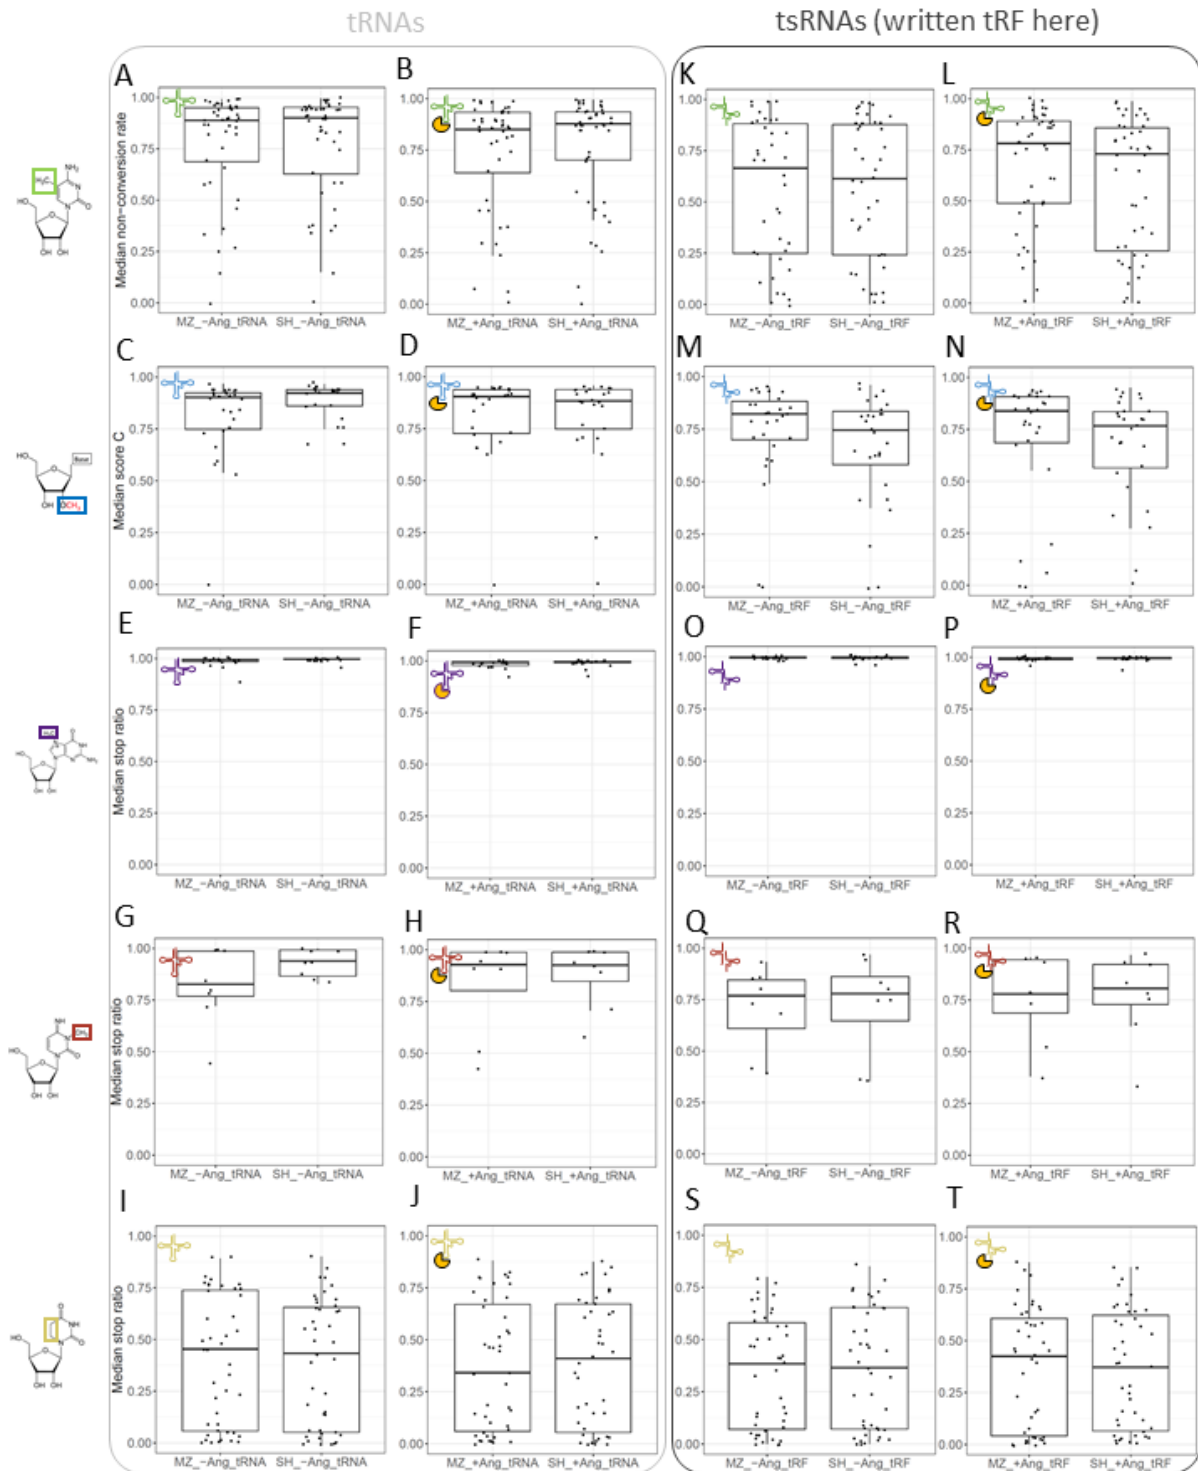

**Figure S5 : Alternative representation of figure 5**

In contrast to Figure 5 separating samples according to their treatment, Panels (A-J) correspond to intact tRNAs samples, while panels (K-T) show the results for tsRNAs samples. Modification levels for m<sup>5</sup>C (A, B, K, L), Nm (2'-O-Me) (C, D, M, N), m<sup>7</sup>G (E, F, O, P), m<sup>3</sup>C (G, H, Q, R) and dihydrouridine D (I, J, S, T) are shown. The values shown here are modification level medians of the respective detection scores obtained for three biological replicates.

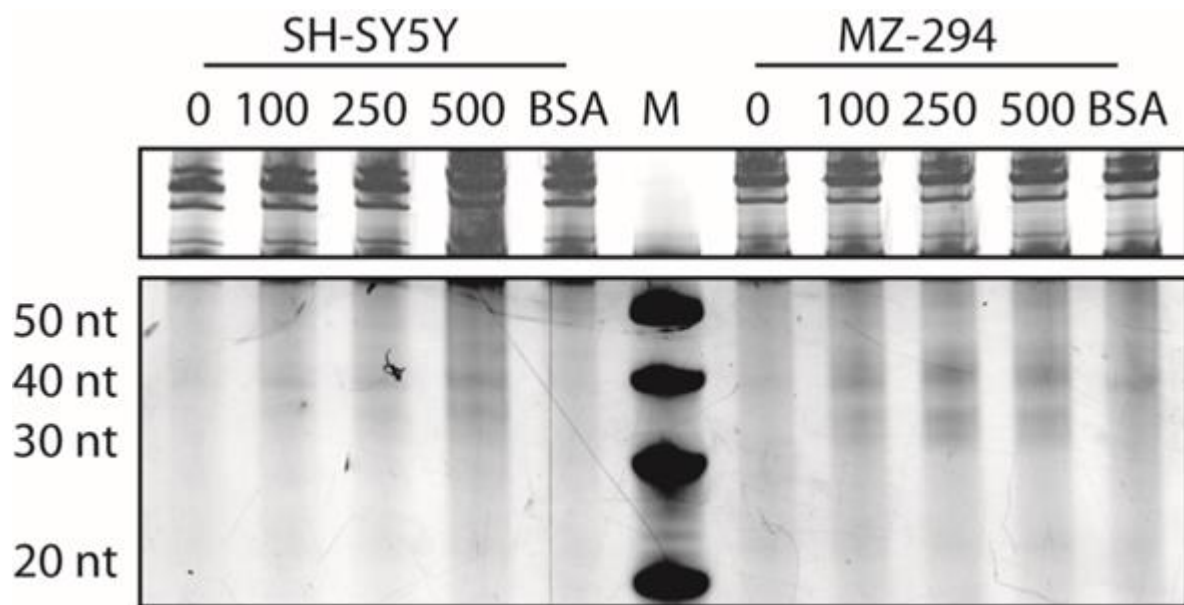

**Figure S6: RNA gel showing RNA fragmentation in SH-SY5Y and MZ-294 cells treated with recombinant human Angiogenin.** Cells were treated with recombinant human Angiogenin or BSA in Serum free Neurobasal media for 3 hours, and total RNA was loaded on a 15 % polyacrylamide TBE-UREA gel which was stained with SYBR Gold for visualisation. Execution and results of this experiments are in keeping with those previously published in [524] Hogg, M.C., et al., *5'ValCAC tRNA fragment generated as part of a protective angiogenin response provides prognostic value in amyotrophic lateral sclerosis*. Brain Commun, 2020. **2**(2): p. fcaa138.

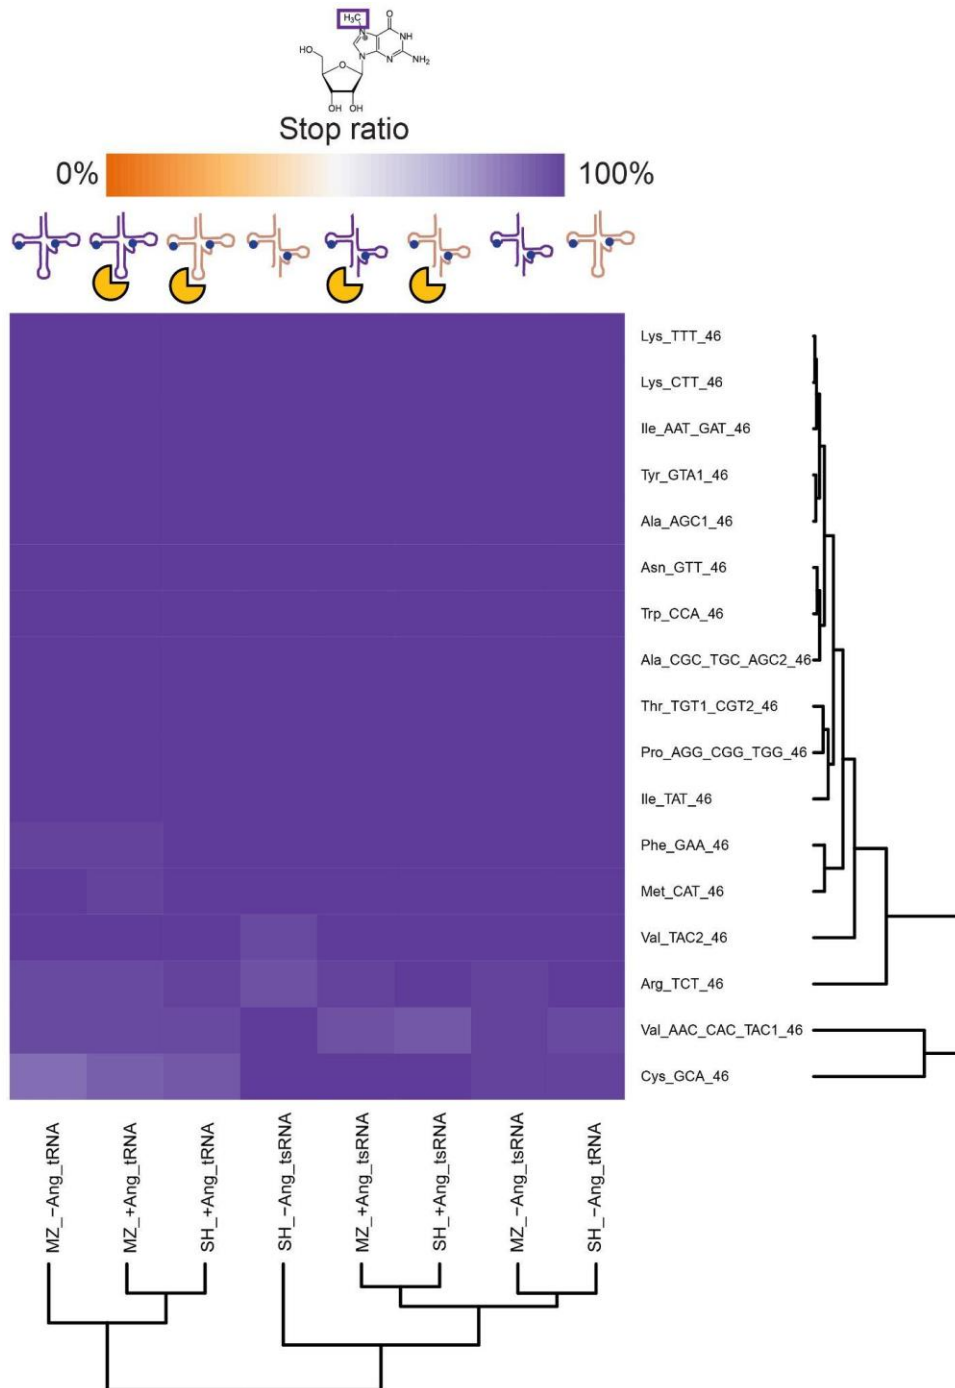

**Figure S7 : Heatmap for the assessment of modification changes in individual isoacceptors and isodecoders of m7G sites.**

This heatmap displays m7G stoichiometry across the different samples (X-axis) and the different sites retained for analysis (Y-axis) through its AlkAnilineSeq quantitative score stop ratio. This stoichiometry is color-coded from orange for low modification level through white for medium one to finish by purple for high. Each sample and each site are hierarchically clustered based on the Euclidean distances between each subset, represented by dendrograms at the bottom for samples and on the right for sites. No specific sites categorisation have been deduced from this heatmap.

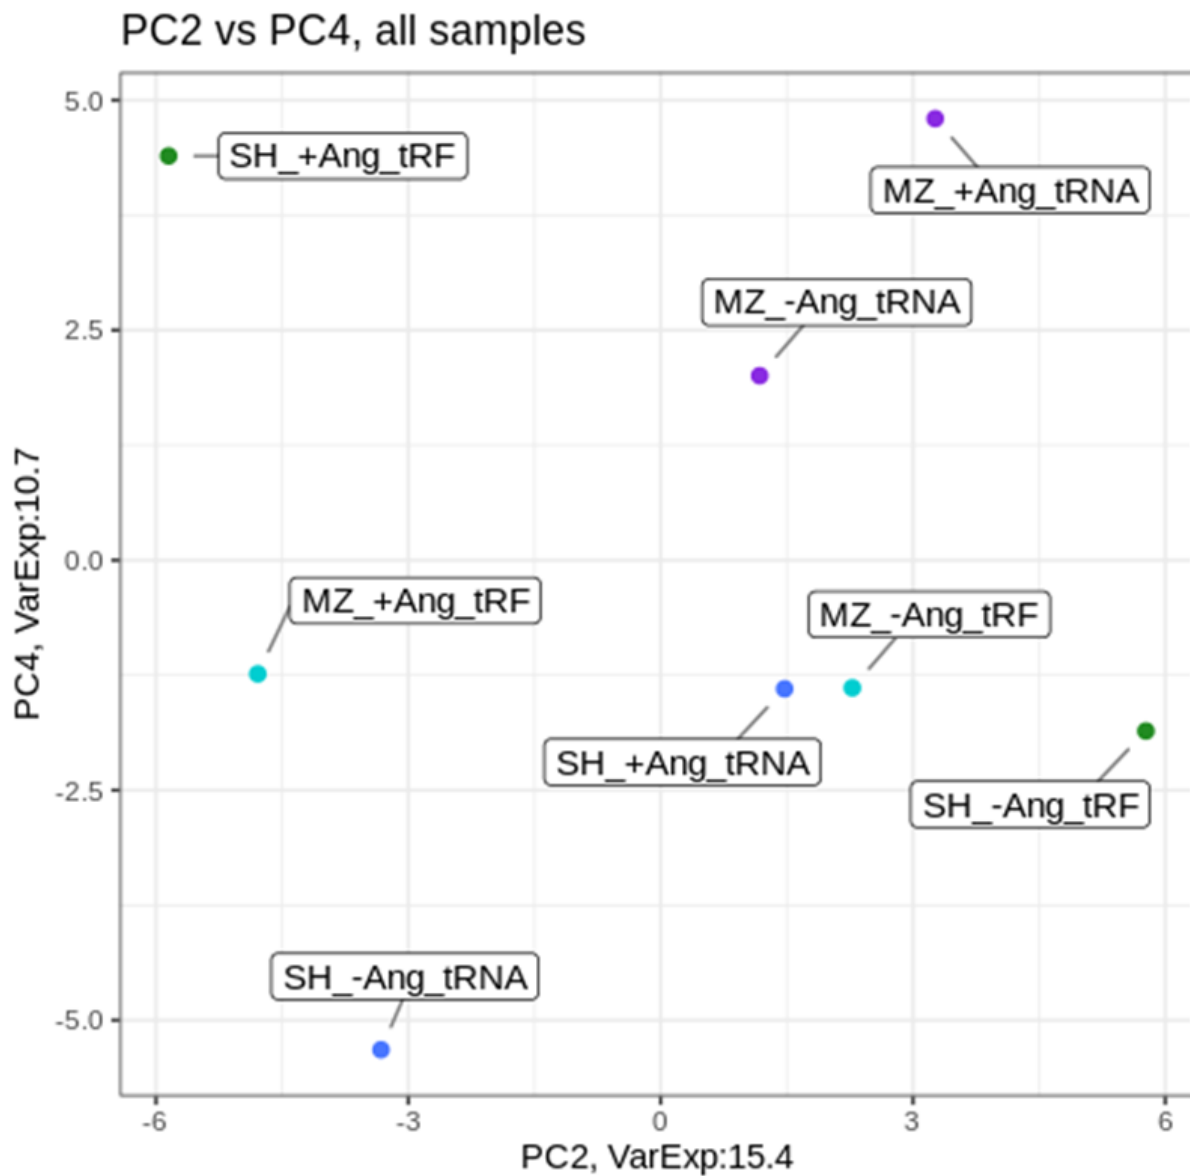

**Figure S8 : Plot of PC2 versus PC4 segregates +ANG samples.**

The combination of orthogonal vectors PC2 and PC4 from Figure 9 allows to illustrate a clear separation for tRNAs along the diagonal from bottom-left to top-right, while providing a distinct angiogenin clustering effect for tRFs along the X-axis. Correlating these two axes with the different sites provides the sites which best explains the biological differences for tRNAs and angiogenin effect for tsRNAs (here labeled “tRFs”) respectively.

Table S7. Contributors to the 4 first PC listed as loadings vectors. The latter correspond as correlation coefficients since PCA has been done on the data's correlation matrix.

| Site                | PC1 loadings | PC2 loadings | PC3 loadings | PC4 loadings | Modification |
|---------------------|--------------|--------------|--------------|--------------|--------------|
| Ala_AGC1_17         | 0.41         | 0.17         | -0.15        | 0.69         | D            |
| Ala_AGC1_20         | 0.51         | 0.20         | -0.73        | -0.04        | D            |
| Ala_AGC1_39         | -0.92        | -0.05        | -0.20        | -0.07        | Nm           |
| Ala_CGC_TGC_AGC2_49 | -0.36        | -0.11        | 0.28         | 0.74         | m5C          |
| Arg_ACG_16          | -0.90        | 0.38         | -0.09        | 0.00         | D            |
| Arg_ACG_47          | 0.01         | -0.12        | 0.37         | -0.36        | D            |
| Arg_CCG1_TCG_32     | -0.42        | -0.81        | 0.39         | -0.02        | Nm           |
| Arg_CCT_CCG2_16     | -0.50        | 0.08         | 0.76         | 0.02         | D            |
| Arg_CCT_CCG2_20     | 0.55         | -0.53        | 0.07         | 0.17         | D            |
| Arg_CCT_CCG2_32     | -0.84        | 0.33         | 0.29         | 0.11         | m3C          |
| Arg_TCT_16          | -0.87        | 0.07         | 0.42         | 0.09         | D            |

|                 |       |       |       |       |     |
|-----------------|-------|-------|-------|-------|-----|
| Arg_TCT_20a     | -0.71 | 0.30  | 0.37  | -0.51 | D   |
| Asn_GTT_16      | 0.53  | 0.67  | -0.24 | -0.12 | D   |
| Asn_GTT_20      | 0.33  | 0.40  | 0.81  | -0.03 | D   |
| Asn_GTT_47      | 0.70  | 0.12  | 0.26  | -0.57 | D   |
| Asn_GTT_54      | -0.95 | -0.13 | -0.24 | -0.09 | Nm  |
| Asp_GTC_20      | 0.76  | -0.32 | -0.11 | -0.11 | D   |
| Asp_GTC_38      | -0.21 | 0.66  | 0.14  | -0.03 | m5C |
| Asp_GTC_48      | 0.42  | 0.22  | 0.35  | -0.63 | m5C |
| Asp_GTC_49      | 0.08  | 0.38  | -0.35 | -0.80 | m5C |
| Cys_GCA_20      | -0.44 | 0.20  | 0.47  | -0.18 | D   |
| Cys_GCA_32      | -0.39 | 0.19  | -0.61 | -0.08 | Nm  |
| Cys_GCA_49      | 0.10  | -0.62 | 0.52  | 0.43  | m5C |
| Gln_CTG1_TTG_17 | -0.27 | 0.89  | 0.09  | 0.08  | D   |
| Gln_CTG1_TTG_18 | -0.84 | -0.47 | -0.12 | -0.08 | Nm  |

|                  |       |       |       |       |     |
|------------------|-------|-------|-------|-------|-----|
| Gln_CTG1_TTG_20  | -0.58 | -0.45 | 0.18  | -0.57 | D   |
| Gln_CTG1_TTG_20a | -0.76 | -0.45 | 0.25  | 0.33  | D   |
| Gln_CTG1_TTG_32  | 0.37  | -0.31 | 0.45  | -0.66 | Nm  |
| Glu_CTC_TTC1_20  | -0.72 | 0.34  | 0.27  | 0.38  | D   |
| Glu_CTC_TTC1_20a | -0.61 | 0.09  | 0.66  | -0.39 | D   |
| Glu_CTC_TTC1_49  | 0.48  | -0.43 | 0.33  | -0.66 | m5C |
| Glu_CTC_TTC1_50  | 0.66  | -0.34 | 0.23  | -0.60 | m5C |
| Glu_CTC_TTC1_54  | -0.80 | -0.10 | -0.25 | -0.23 | Nm  |
| Glu_TTC2_20      | -0.69 | -0.66 | 0.21  | 0.08  | D   |
| Glu_TTC2_20a     | -0.42 | -0.83 | -0.23 | -0.13 | D   |
| Glu_TTC2_49      | -0.55 | 0.18  | -0.33 | -0.67 | m5C |
| Glu_TTC2_50      | -0.65 | 0.24  | -0.27 | -0.51 | m5C |
| Glu_TTC2_54      | -0.96 | -0.08 | -0.19 | -0.17 | Nm  |
| Gly_CCC1_GCC_38  | 0.78  | -0.19 | 0.12  | 0.23  | m5C |



|                 |       |       |       |       |     |
|-----------------|-------|-------|-------|-------|-----|
| Gly_CCC1_GCC_48 | 0.71  | -0.08 | -0.32 | -0.56 | m5C |
| Gly_CCC1_GCC_49 | -0.82 | -0.21 | -0.21 | -0.34 | m5C |
| Gly_CCC1_GCC_50 | 0.14  | -0.60 | -0.03 | -0.58 | m5C |
| Gly_CCC2_20     | -0.89 | -0.27 | 0.14  | 0.06  | D   |
| Gly_CCC2_32     | 0.56  | -0.04 | 0.81  | 0.01  | Nm  |
| Gly_CCC2_39     | -0.55 | 0.65  | -0.06 | -0.46 | Nm  |
| Gly_CCC2_49     | 0.57  | -0.46 | 0.39  | -0.54 | m5C |
| Gly_CCC2_50     | 0.72  | -0.50 | 0.15  | -0.45 | m5C |
| Gly_TCC_20      | -0.74 | -0.54 | 0.00  | 0.31  | D   |
| Gly_TCC_49      | 0.10  | 0.69  | -0.35 | 0.47  | m5C |
| Gly_TCC_50      | 0.56  | -0.19 | -0.20 | -0.69 | m5C |
| His_GTG_17      | 0.42  | -0.23 | -0.73 | 0.09  | D   |
| His_GTG_20      | 0.66  | -0.55 | -0.05 | -0.34 | D   |
| His_GTG_20a     | 0.68  | -0.33 | 0.36  | -0.51 | D   |

|                |       |       |       |       |     |
|----------------|-------|-------|-------|-------|-----|
| His_GTG_49     | -0.85 | -0.47 | 0.17  | -0.06 | m5C |
| His_GTG_50     | 0.08  | -0.47 | -0.24 | -0.14 | m5C |
| Ile_AAT_GAT_48 | -0.96 | 0.03  | 0.27  | 0.05  | m5C |
| Leu_CAG_CAA_32 | -0.94 | 0.02  | -0.24 | -0.24 | Nm  |
| Leu_CAG_CAA_44 | -0.81 | -0.25 | -0.49 | 0.06  | Nm  |
| Leu_CAG_CAA_48 | -0.98 | -0.02 | 0.07  | -0.09 | m5C |
| Leu_CAG_CAA_e2 | 0.48  | -0.27 | 0.18  | -0.60 | m3C |
| Leu_TAA_48     | -0.94 | 0.17  | 0.11  | -0.03 | m5C |
| Lys_CTT_16     | -0.35 | 0.24  | 0.32  | 0.67  | D   |
| Lys_CTT_48     | -0.97 | -0.12 | 0.16  | 0.04  | m5C |
| Lys_CTT_54     | -0.86 | 0.15  | -0.08 | -0.31 | Nm  |
| Lys_TTT_16     | -0.75 | 0.57  | -0.17 | 0.12  | D   |
| Lys_TTT_49     | -0.98 | 0.14  | 0.05  | 0.06  | m5C |
| Lys_TTT_54     | -0.80 | 0.39  | -0.14 | -0.19 | Nm  |

|                    |       |       |       |       |     |
|--------------------|-------|-------|-------|-------|-----|
| Met_CAT_20         | 0.53  | 0.23  | 0.13  | -0.65 | m3C |
| Met_CAT_34         | -0.38 | 0.56  | 0.22  | -0.10 | Nm  |
| Met_CAT_47         | -0.24 | 0.77  | -0.10 | -0.27 | D   |
| Met_CAT_49         | -0.84 | -0.01 | 0.17  | -0.24 | m5C |
| Phe_GAA_16         | -0.80 | -0.08 | 0.27  | -0.38 | D   |
| Phe_GAA_17         | -0.78 | -0.03 | 0.36  | -0.13 | D   |
| Phe_GAA_34         | -0.86 | -0.06 | -0.18 | 0.12  | Nm  |
| Phe_GAA_47         | 0.22  | 0.46  | 0.80  | -0.03 | D   |
| Phe_GAA_49         | -0.94 | -0.08 | 0.11  | -0.28 | m5C |
| Pro_AGG_CGG_TGG_20 | -0.33 | -0.86 | -0.07 | 0.03  | D   |
| Pro_AGG_CGG_TGG_32 | -0.89 | -0.07 | -0.41 | -0.16 | Nm  |
| Pro_AGG_CGG_TGG_49 | -0.74 | -0.45 | -0.40 | -0.12 | m5C |
| Pro_AGG_CGG_TGG_50 | -0.89 | -0.20 | -0.25 | -0.24 | m5C |
| Ser_AGA_TGA_17     | 0.33  | -0.65 | 0.34  | 0.36  | D   |

|                          |       |       |       |       |     |
|--------------------------|-------|-------|-------|-------|-----|
| Ser_AGA_TGA_18           | -0.85 | -0.15 | -0.49 | -0.05 | Nm  |
| Ser_AGA_TGA_20           | 0.22  | 0.60  | 0.41  | -0.32 | D   |
| Ser_AGA_TGA_20a          | 0.42  | -0.57 | 0.30  | 0.51  | D   |
| Ser_AGA_TGA_32           | -0.86 | -0.45 | -0.14 | 0.18  | m3C |
| Ser_AGA_TGA_44           | -0.84 | -0.24 | -0.41 | 0.06  | Nm  |
| Ser_AGA_TGA_49           | -0.98 | 0.10  | 0.09  | -0.02 | m5C |
| Ser_GCT_18               | -0.79 | 0.32  | -0.14 | -0.38 | Nm  |
| Ser_GCT_32               | -0.77 | -0.47 | 0.14  | 0.20  | m3C |
| Ser_GCT_39               | -0.37 | -0.44 | -0.76 | -0.22 | Nm  |
| Ser_GCT_44               | -0.81 | -0.35 | -0.42 | 0.09  | Nm  |
| Ser_GCT_49               | -0.94 | 0.18  | 0.09  | 0.02  | m5C |
| Thr_AGT_CGT3_TGT2_3<br>2 | -0.85 | 0.33  | 0.30  | -0.25 | m3C |
| Thr_AGT_CGT3_TGT2_4<br>7 | 0.04  | -0.90 | 0.23  | -0.10 | D   |

|                     |       |       |       |       |     |
|---------------------|-------|-------|-------|-------|-----|
| Thr_CGT1_32         | -0.76 | -0.48 | 0.34  | 0.25  | m3C |
| Thr_CGT1_48         | -0.99 | -0.09 | 0.07  | 0.02  | m5C |
| Thr_CGT1_72         | -0.81 | -0.37 | 0.45  | 0.06  | m5C |
| Thr_TGT1_CGT2_20    | 0.72  | 0.23  | -0.38 | -0.14 | D   |
| Thr_TGT1_CGT2_32    | -0.95 | 0.16  | 0.06  | -0.06 | m3C |
| Thr_TGT1_CGT2_48    | -0.95 | -0.23 | 0.07  | 0.00  | m5C |
| Thr_TGT1_CGT2_72    | -0.71 | -0.27 | 0.34  | 0.08  | m5C |
| Trp_CCA_39          | -0.91 | 0.29  | 0.02  | -0.13 | Nm  |
| Tyr_GTA1_16         | 0.90  | -0.10 | -0.13 | 0.02  | D   |
| Tyr_GTA1_17         | 0.98  | 0.05  | -0.15 | 0.07  | D   |
| Tyr_GTA1_47         | -0.76 | 0.43  | 0.04  | -0.01 | D   |
| Tyr_GTA1_48         | -0.97 | 0.09  | 0.12  | 0.04  | m5C |
| Val_AAC_CAC_TAC1_17 | 0.68  | -0.37 | 0.43  | 0.42  | D   |
| Val_AAC_CAC_TAC1_38 | 0.42  | 0.42  | 0.72  | -0.14 | m5C |

|              |       |       |      |       |     |
|--------------|-------|-------|------|-------|-----|
| Val_TAC2_20  | -0.55 | 0.65  | 0.38 | 0.27  | D   |
| Val_TAC2_20a | 0.67  | 0.41  | 0.36 | 0.17  | D   |
| Val_TAC2_48  | -0.72 | -0.02 | 0.52 | -0.06 | m5C |
| Val_TAC2_49  | -0.68 | -0.18 | 0.52 | -0.30 | m5C |

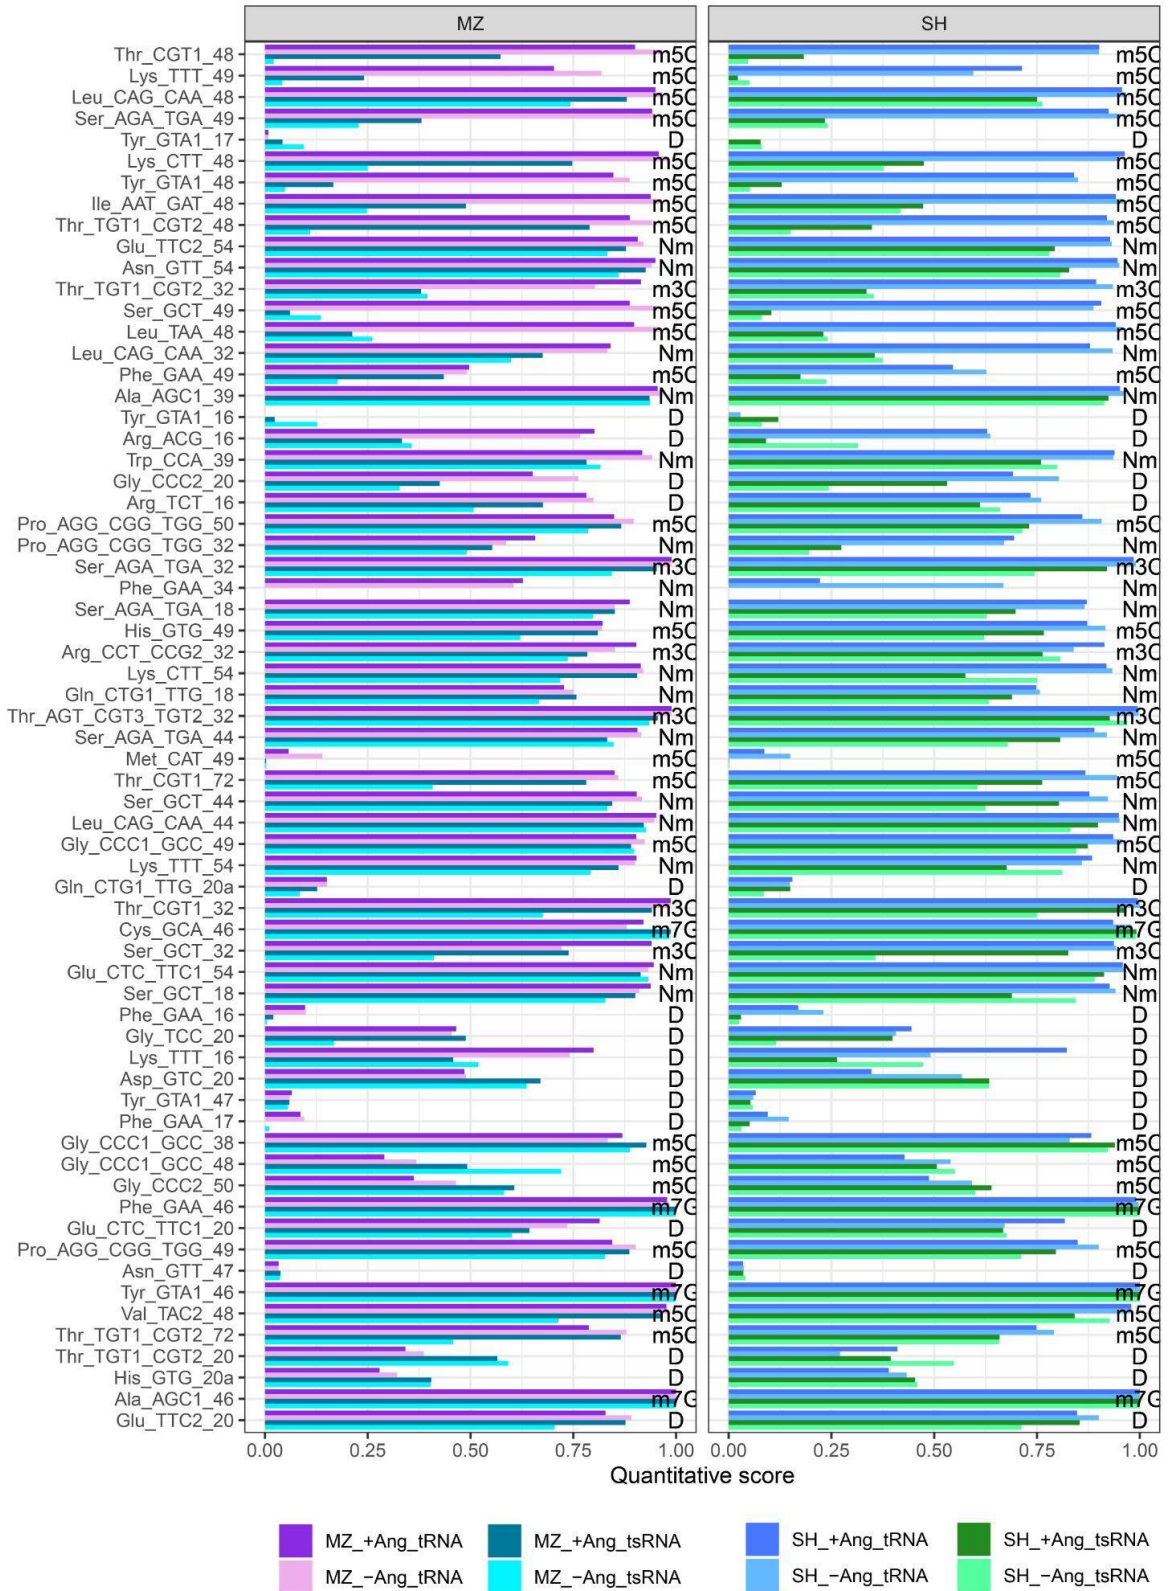

**Figure S9: Barplots displaying modification stoichiometry values for main contributors of PC1.**

Left panels for MZ cells, right panels for SH cells. The nature of modified nucleotide is shown at the top of each bar, and the identity of tRNA/tsRNA site on the left along the Y-axis. Color code indicates the identity of the sample (tRNA/tsRNA) and treatment with ANG (-Ang/+Ang).
